# Supplementary material for: The evolutionary history of calreticulin and calnexin genes in green plants
Source: Springer Nature journal article supplement (doi:10.1007/s10709-010-9544-y), 2011-01-10
Supplement: MOESM1 [file 10709_2010_9544_MOESM1_ESM.xls]

## Sheet: Plan1
Supplemental Table I. CRT and CNX Possible Groups of Orthologous (PoGOs) in green plants. From Del Bem (2010) - The evolutionary history of Calreticulin and Calnexin genes in Green plants.
		CRT nº	Gene Code	Lineage-specific PoGOs	Taxonomic Rank
	PoGO CRT1/2	AtCRT1	AT1G56340		Eudicots	Angiosperms (Magnoliophyta)		Tracheophyta
		AtCRT2	AT1G09210
		AlCRT1	888161
		AlCRT2	471010
		AlCRT3	883411
		GmCRT1	Glyma20g23080
		GmCRT2	Glyma19g28890
		RcCRT1	30128.m008900
		PtCRT1	811231
		PtCRT2	729432
		VvCRT1	GSVIVP00022619001
		VvCRT5	GSVIVP00028103001
		OsCRT1	Os03g61670	PoGO1	Monocots
		SbCRT1	Sb01g002430
		OsCRT2	Os07g14270	PoGO2
		SbCRT2	Sb02g007480
		ZmCRT1	MAGIv4.0 51076
		Picea sitchensis-CRT1	TA20930_3332	PoGO1	Coniferopsida	Coniferophyta
		Picea abies-CRT1	TA1603_3329
		Pinus taeda-CRT1	TA789_3352
		Picea glauca-CRT1	TA17176_3330
		Pinus taeda-CRT2	TA5639_3352	PoGO2
		Pinus pinaster-CRT1	TA4383_71647
		Picea sitchensis-CRT2	TA22731_3332
		Picea glauca-CRT2	TA17668_3330
		Welwitschia mirabilis-CRT1	TA538_3377		Gnetopsida	Gnetophyta
		Welwitschia mirabilis-CRT2	DT599787
		Cycas rumphii-CRT1	CB092503		Cycadopsida	Cycadophyta
		Ceratopteris richardii-CRT1	TA649_49495		Filicopsida	Filicophyta (Pterydophyta)
		Sm-CRT1	144212		Isoetopsida	Lycophyta
	PoGO CRT3	AtCRT3	AT1G08450		Eudicots	Angiosperms (Magnoliophyta)		Embryophyta
		AlCRT4	888076
		GmCRT3	Glyma12g05460
		GmCRT4	Glyma11g13460
		GmCRT5	Glyma09g38410
		GmCRT6	Glyma18g47930
		RcCRT2	29929.m004552
		PtCRT3	562210
		PtCRT4	292774
		PtCRT5	249138
		VvCRT2	TCVV008537
		VvCRT3	GSVIVP00025039001
		VvCRT4	GSVIVP00010301001
		OsCRT3	Os01g67054	PoGO1	Monocots
		SbCRT3	Sb03g042500
		OsCRT4	Os05g43170	PoGO2
		SbCRT4	Sb09g024930
		Picea glauca-CRT3	TA27375_3330		Coniferopsida	Coniferophyta
		Ginkgo biloba-CRT1	DR064562		Ginkgopsida	Ginkgophyta
		SmCRT2	89431		Isoetopsida	Lycophyta
		PpCRT1	164102		Bryopsida	Bryophyta
		PpCRT2	56347
		Marchantia polymorpha-CRT1	BJ850397		Marchantiopsida	Marchantiophyta
	PoGO Proto-CRT	Chlamydomonas reinhardtii-CRT1	78954		Chlorophyceae	Chlorophyta
		Volvox carteri-CRT1	76046
		Chlorella vulgaris-CRT1	43565		Trebouxiophyceae
		Micromonas sp. RCC299-CRT1	44674		Prasinophyceae
		Micromonas pusilla-CRT1	64687
		CNX nº	Gene Code	Lineage-specific PoGOs	Taxonomic Rank
	PoGO CNX	AtCNX1	AT5G61790		Eudicots	Angiosperms (Magnoliophyta)		Viridiplantae
		AtCNX2	AT5G07340
		AlCNX1	358384
		AlCNX2	496347
		GmCNX1	Glyma06g17060
		GmCNX2	Glyma04g38000
		GmCNX3	Glyma05g33330
		GmCNX4	Glyma08g00920
		PtCNX1	733819
		PtCNX2	823453
		PtCNX3	179443
		RcCNX1	30147.m014384
		VvCNX1	GSVIVP00006229001
		VvCNX2	TCVV001346
		OsCNX1	Os04g32950		Monocots
		SbCNX1	Sb06g015020
		ZmCNX1	MAGIv4.0 146104
		Ceratopteris richardii-CNX1	BE642786			Filicophyta (Pterydophyta)
		Ceratopteris richardii-CNX2	CV735874		Filicopsida
		Ceratopteris richardii-CNX3	TA596_49495
		PpCNX1	59289		Bryopsida	Bryophyta
		PpCNX2	191189
		PpCNX3	118597
		PpCNX4	129910
		Marchantia polymorpha-CNX1	TA2641_3197		Marchantiopsida	Marchantiophyta
		Chlamydomonas reinhardtii-CNX1	108711		Chlorophyceae
		Volvox carteri-CNX1	77379		Chlorophyceae	Chlorophyta
		Chlorella vulgaris-CNX1	30353		Trebouxiophyceae
		Chlorella sp.NC64A-CNX1	136909
		Chlorella sp.NC64A-CNX2	136908
		Micromonas pusilla-CNX1	67567		Prasinophyceae
		Micromonas sp.RCC299-CNX1	2468
		Ostreococcus tauri-CNX1	2616
		Ostreococcus sp. RCC809-CNX1	44243
